# Supplementary material for: Impact of capillary rise and recirculation on simulated crop yields
Source: Copernicus journal article supplement (doi:10.5194/hess-22-2937-2018), 2018-05-17
Supplement: Supplementary file 1 [file hess-22-2937-2018-supplement.zip]

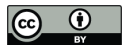

## *Supplement of*

# **Impact of capillary rise and recirculation on simulated crop yields**

**Joop Kroes et al.**

*Correspondence to:* Joop G. Kroes ([joop.kroes@wur.nl](mailto:joop.kroes@wur.nl))

- [hess-22-2937-2018-supplement-title-page.pdf](#)
- [Manuscript2017-223\\_Kroes\\_et\\_al\\_SupplMat.docx](#)

The copyright of individual parts of the supplement might differ from the CC BY 3.0 License.
